# Supplementary material for: Characterization of Oligomers of Heterogeneous Size as Precursors of Amyloid Fibril Nucleation of an SH3 Domain: An Experimental Kinetics Study
Source: PubMed Central journal article supplement (PMC3507826; doi:10.1371/journal.pone.0049690), 2012-11-27
Supplement: pone.0049690.s001.pdf [file pone.0049690.s001.pdf]

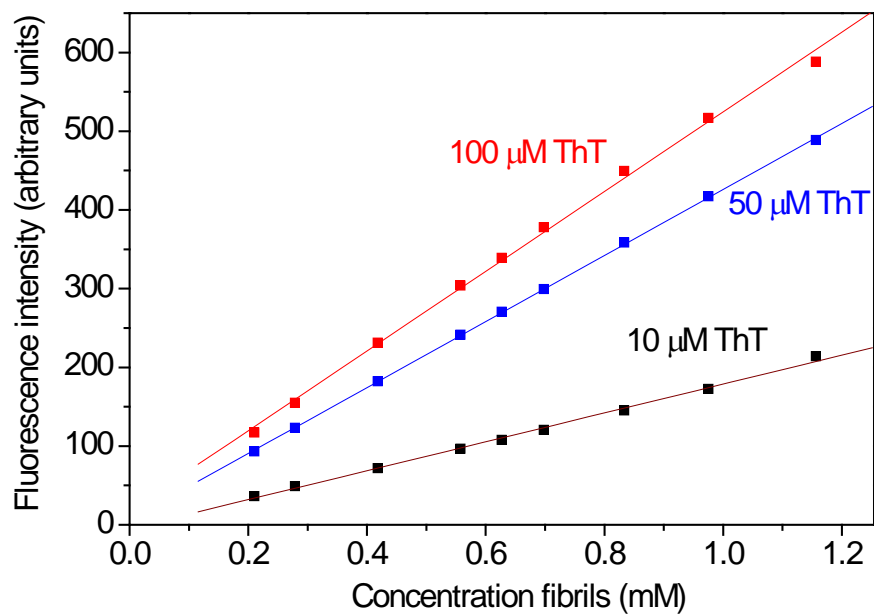

**Figure S1.** Linearity of the thioflavine T (ThT) fluorescence as a function of the concentration of amyloid fibrils. Amyloid fibrils of N47A mutant of the Spc-SH3 were prepared by incubation at 37°C in 100 mM glycine buffer, 100 mM NaCl pH 3.2, isolated by centrifugation and resuspended in the same buffer for ThT assay.
