# Supplementary material for: Characterization of Oligomers of Heterogeneous Size as Precursors of Amyloid Fibril Nucleation of an SH3 Domain: An Experimental Kinetics Study
Source: PubMed Central journal article supplement (PMC3507826; doi:10.1371/journal.pone.0049690), 2012-11-27
Supplement: pone.0049690.s004.pdf [file pone.0049690.s004.pdf]

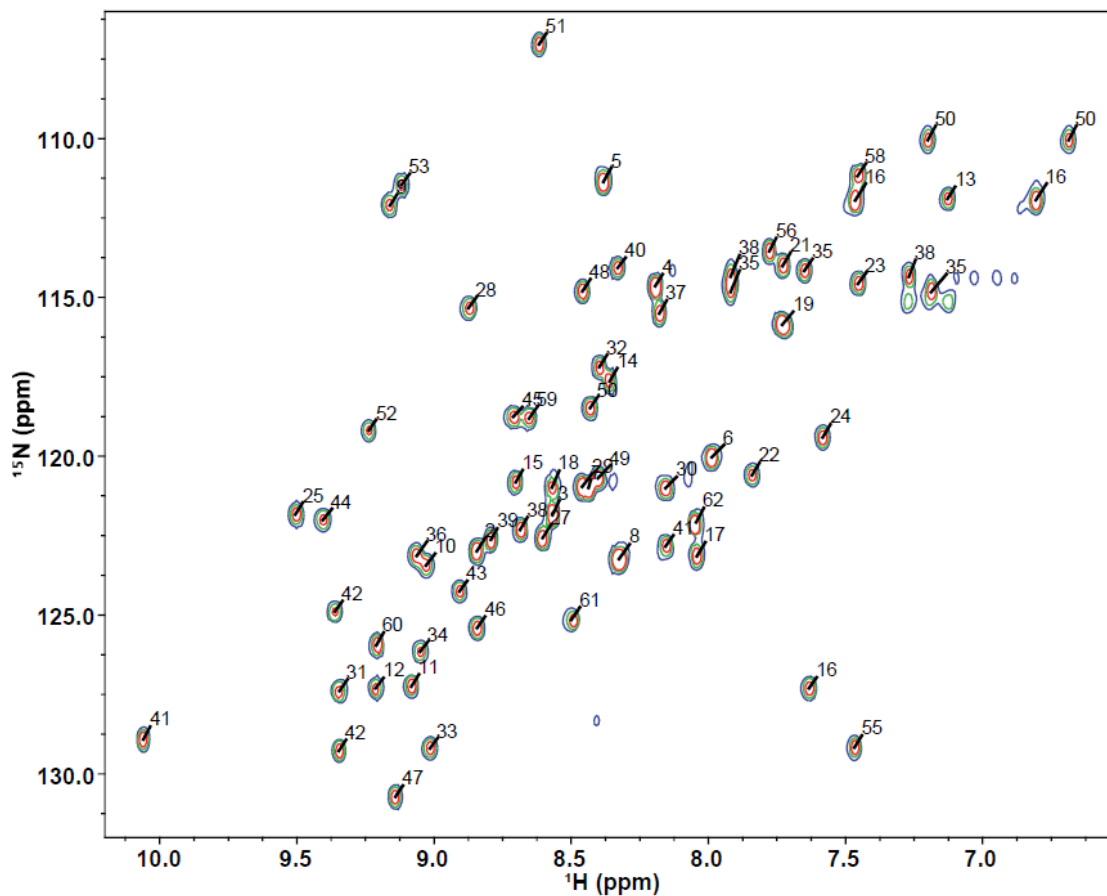

**Figure S4:** Overlay of  $^{15}\text{N}$ - $^1\text{H}$  HSQC NMR spectra of N47A Spc-SH3 at different times of aggregation at 37°C. Buffer conditions were the same as in Figure S3, except for the use of per-deuterated glycine and the addition of 10%  $\text{D}_2\text{O}$  for field lock. The concentration of  $^{15}\text{N}$ -labelled protein was 1.1 mM ( $8 \text{ mg mL}^{-1}$ ). The three spectra have been plotted using a single contour level and the same intensity threshold. The times of incubation are: 3 min (blue); 50 min (green) and 1957 min (red). The numbers next to each cross-peak indicate the residue number assignment.
