# Supplementary material for: Characterization of Oligomers of Heterogeneous Size as Precursors of Amyloid Fibril Nucleation of an SH3 Domain: An Experimental Kinetics Study
Source: PubMed Central journal article supplement (PMC3507826; doi:10.1371/journal.pone.0049690), 2012-11-27
Supplement: pone.0049690.s008.pdf [file pone.0049690.s008.pdf]

## Text S2: Model simulations.

Using the equations of the model described in Text S2 we have simulated the initial rates of nucleation as a function of the initial protein concentrations.

1. Amyloid nucleation of a stable partially unfolded amyloidogenic intermediate. In this case the I state is the most stable state. This is equivalent to the linear polymerization model of Oosawa and Kasai<sup>1</sup>. To simulate this case we can assume that  $K_I$  is large compared to  $K_U$ .

The following data were calculated for  $K_I = 100$ ,  $K_U = 0.12$ , and different values of  $K_A$ .  $k_f = 1 \text{ min}^{-1}$ .

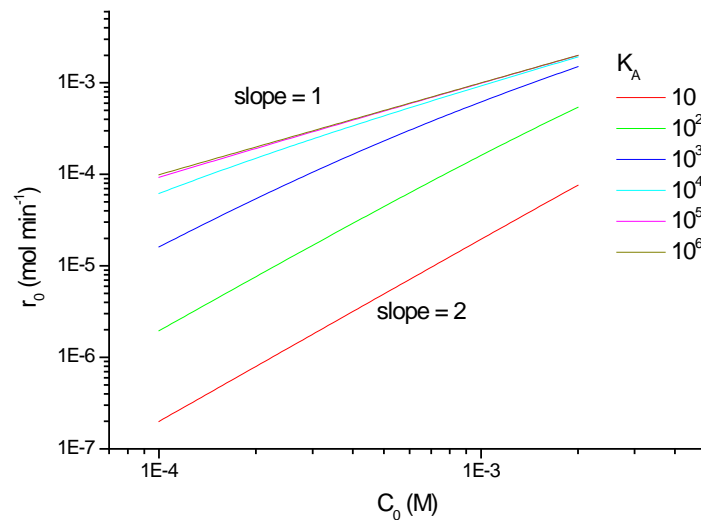

The slope changes gradually from 2 to 1 as  $K_A$  increases. This is logical because for low  $K_A$ , the monomer governs the pre-equilibrium but it has to self-associate into dimers to form nuclei. For high values of  $K_A$  most of the protein is oligomeric from the beginning of the process and the process appears first order.

2. Amyloid nucleation of a folded protein.

In this case the pre-oligomerization equilibrium is coupled to the folding-unfolding equilibrium. The relative population of I and  $A_i$  will be reduced depending on the values of the equilibrium constants  $K_I$  and  $K_U$ .

a) Effect of  $K_I$  and  $K_A$ .  $K_A$  was varied independently of  $K_I$  for  $K_U = 0.12$  and  $k_f = 1 \text{ min}^{-1}$ .

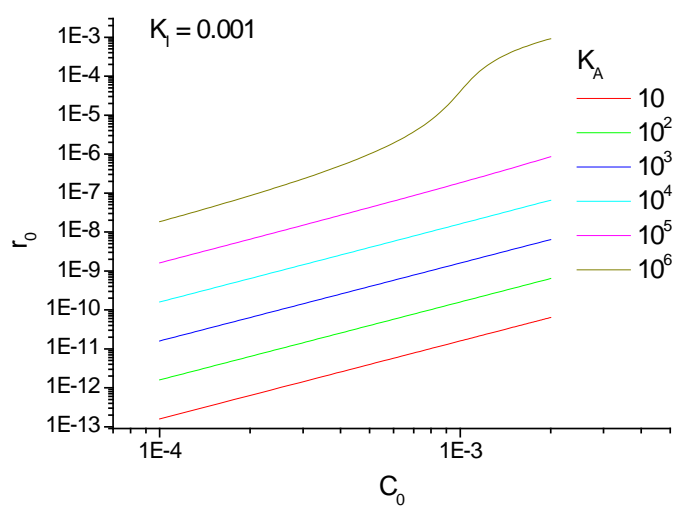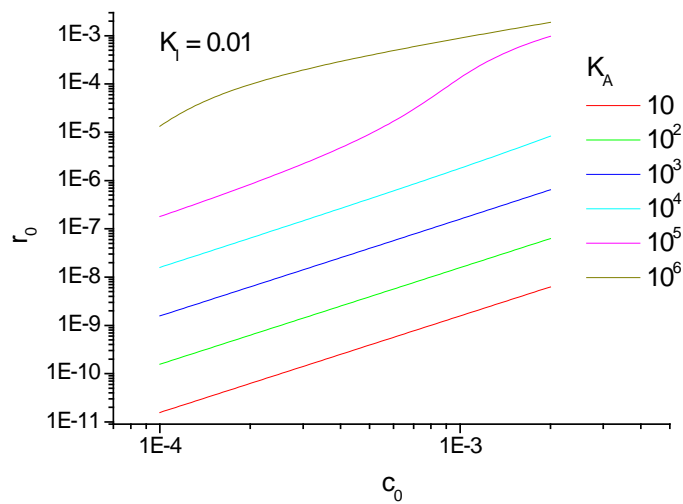

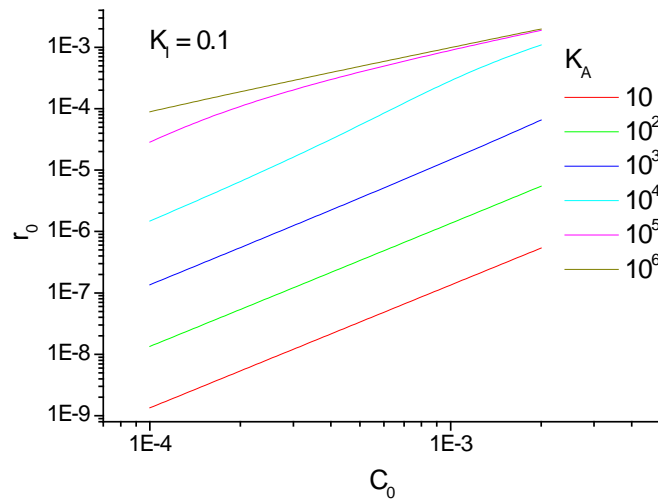

The rate of nucleation depends very strongly on  $K_A$  and  $K_I$ :

- For  $C_0 \ll (K_A K_I)^{-1}$  the rate of nucleation is very low and scales on the second power of  $C_0$ .
- If  $C_0 \gg (K_A K_I)^{-1}$ , the rate tends to a limit imposed by  $k_F$  and the nucleation is first order.
- If  $C_0 \approx (K_A K_I)^{-1}$ , there is a transient increase in the slope of the double logarithmic plot. This is due to an abrupt displacement of the oligomerization equilibrium as  $C_0$  increases. The value  $(K_A K_I)^{-1}$  acts as a critical concentration.

b) Next we simulated curves for the same product  $K_A K_I = 10^3$  but changing their relative values.  $K_U$  and  $k_F$  are the same as in a)

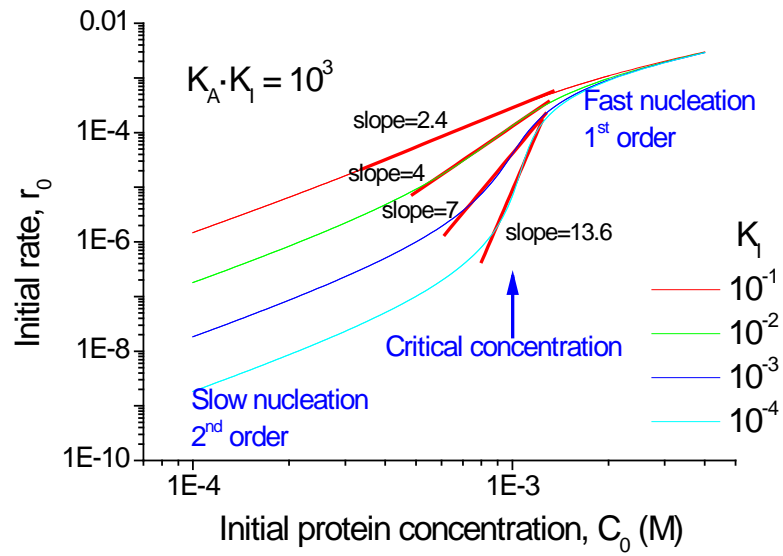

In the region of the critical concentration  $C_0 \approx (K_A K_I)^{-1}$  there is a transient slope increase. The slope is higher for higher  $K_A$  and lower  $K_I$  values.

c) Effect of the global unfolding equilibrium constant  $K_U$ :

Simulations were made varying  $K_U$  and the resulting values of the unfolding Gibbs energy,  $\Delta G_U$ . Values of  $K_A$  and  $K_I$  are as in b)

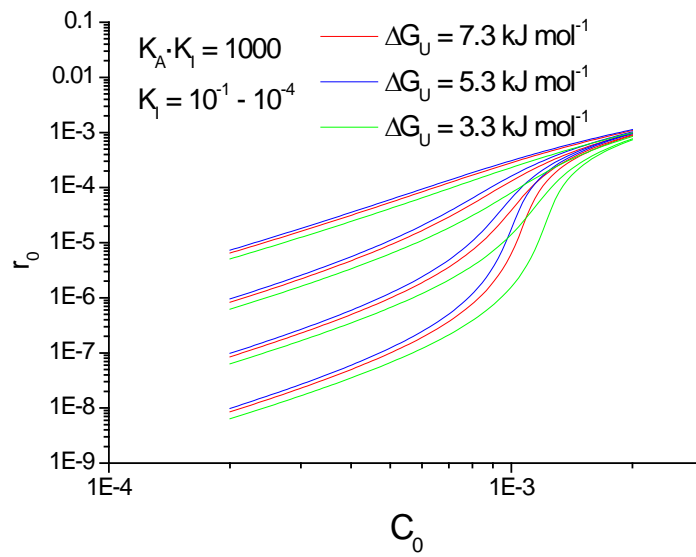

The unfolding Gibbs energy does not have a strong effect on the initial rates because it has a relatively low effect on the population of the amyloidogenic intermediate.

- (1) Oosawa, F.; Kasai, M. Theory of Linear and Helical Aggregations of Macromolecules. *J. Mol. Biol.* **1962**, *4*, 10.
